# Supplementary material
Source: Frontiers journal article supplement (https://www.frontiersin.org/articles/97668)
Supplement: Data_Sheet_1.DOCX [file Data_Sheet_1.DOCX]

**Supporting Information**

**Table S1:** Proteins detected from LC-MS/MS under copper stress (excel spreadsheet)

**Table S2** Primers used in study. Temp. is the annealing temperature used for amplification. Size is the nucleotide length of the PCR product in base pairs (bp) in wild-type and (mutant where applicable)

*Primer Primer Sequence (5’-3’) Temp (°C) Size (bp)*

2176QPCRfwd CCAGTCTCCGACCTTCAATC 58 293

2176QPCRrvs CACTCTTCCGCCATTTCTTT

0807QPCRfwd CTGAAGGAAGGGTCAACACC 58 242

0807QPCRrvs GACGAGCAAGGACGGAATAA

GrELQPCRfwd GCGAAATACGGGGAGATGTA 58 151

GrELQPCRrvs ACGAAGAAGTCGGCAAGATG

2176dblfwd GTGATTTTGCCCTCGTTGTC 56 1997

2176dblrvs CGTGAGTTCGAAGGAGCTGT

2176ckfwd TGGGCGATTGCCGTTGGCAA 59 411 (1670)

2176ckrvs GATCACGTCACCCGGCTTCA

0921ckfwd GTTCCGTCGACATCCTTGTG 59 1749 (3315)

0921ckrvs CGCTGCTCTGAAGTTCTCTC

**Table S3:** Proteins detected in excised region 1 (figure S3). Sequenced protein hits as a percentage of total hits identified with 95% confidence .

| **Locus** | **Protein description** | **% total hits in band** | **Microarry P-starvation inducible?a** |
| --- | --- | --- | --- |
| SYNW0762 | Putative atypical alkaline phosphatase with phytase and RTX domain | 54.8 | Y |
| SYNW2391 | Alkaline phosphatase | 26.9 | Y |
| SYNW0406 | Heavily glycosylated protein | 13.0 | Y |
| SYNW0085 | SwmA-cell surface protein required for swimming motility | 2.6 | Y |
| SYNW0165 | PsiP1 phosphate inducible protein 1 | 2.6 | Y |

**a** From Tetu et al., 2009 ([23](#_ENREF_23))

**Table S4** WH8102 porin modeling

| **locus** | **+ resa** | **- resa** | **+ to -a** | **pIb** | **Chg at pH 7.0b** | **Wt protein abundance in Control vs Cuc** | **protein abundance in wt/mutantd** | **Array high/moderate Cue** |
| --- | --- | --- | --- | --- | --- | --- | --- | --- |
| SYNW2224 | 14 | 25 | 0.56 | 7.7 | 1.3 | 9.9/7.3 | 4.88/3.12 | -0.97/NS |
| SYNW2227 | 4 | 23 | 0.17 | 4.38 | -28.6 | 0.37/0.14 | ND/0.89 | -2.03/-0.62 |
| SYNW2128 | 9 | 20 | 0.45 | 4.61 | -25.9 | ND/ND | ND/ND | NS/NS |
| SYNW2223 | 23 | 22 | 1.04 | 5.75 | -8.2 | ND/ND | ND/ND | NS/0.47 |

a Positive and negative outer loop amino acid residues on porin proteins as calculated using PRED-TMBB ([Bagos et al., 2004](#_ENREF_3)), and ratio of positive to negative residues.

b Isoelectric point and charge at pH 7.0 calculated based on amino acid sequences using Protein Calculator v3.3 (www.scripps.edu/~cdputnam/protcalc.html)

c spectral count percentages based on one biological replicate of either a copper-treated or control wt culture outer membrane insoluble fraction sample.

d average spectral count percentages based on two biological replicates of outer membrane insoluble fraction samples from wt or SYNW2176-

e based on data from ([Stuart et al., 2009](#_ENREF_47))

**Figure S1:** Gene expression over 24 hours following moderate copper shock addition. QRTPCR of SYNW2176 and two other comparative 2-hour high-copper induced genes in WH8102 after pCu11.1 addition. All values are calculated log2 fold changes over control no-copper treatment. Error bars represent one standard deviation between three biological replicates. Stars represent statistical significance (p<0.05) of one sample t-test (mean=0).

**Figure S2:** PCR verification of SYNW2176- mutant. (A) Agarose gel of the PCR products and (B) diagram of the insertional inactivation. “wt” is wild-type WH8102, “2176-“ is strain SYNW2176-, and “neg” is the negative control PCR with no input DNA. In panel A from left to right first three columns after ladder are PCR using 2176ck primers (verification primers). Next three columns are PCR using positive control primers to amplify 1279bp around SYNW0921.

**Figure S3:** Comparison of mutant and wild type proteins from (A) soluble membrane fraction (HSS) and (B) insoluble membrane fraction (HSP) after 6 hours of copper stress or control conditions in both strains. Bracket and “1” indicate approximate location of band excision for sequencing. SDS-PAGE protein gels (3-8% Tris-Acetate).

**Figure S4** Porin modeling showing charge of outer loop residues. Red colored residues are negatively charged and blue are positive.
